# Supplementary material for: Cellular and genetic drivers of RNA editing variation in the human brain
Source: PubMed Central journal article supplement (PMC9151768; doi:10.1038/s41467-022-30531-0), 2022-05-30
Supplement: 41467_2022_30531_MOESM3_ESM.pdf [file 41467_2022_30531_MOESM3_ESM.pdf]

## **Description of Additional Supplementary Files**

File Name: Supplementary Data 1

Description: *Alu* editing index and hyper-editing across purified cortical cell types.

File Name: Supplementary Data 2

Description: Annotation of cell-specific RNA editing sites.

File Name: Supplementary Data 3

Description: RNA editing sites as a function of gene length.

File Name: Supplementary Data 4

Description: RNA editing sites associated with ADAR and RBP expression.

File Name: Supplementary Data 5

Description: Differential RNA editing across cell types.

File Name: Supplementary Data 6

Description: Sample metadata and primer information for rhAmpSeq validation of recoding RNA-editing sites.

File Name: Supplementary Data 7

Description: RNA editing recoding events.

File Name: Supplementary Data 8

Description: snRNA-seq cellular pools.

File Name: Supplementary Data 9

Description: Features of global editing across bulk GTEx brain regions.

File Name: Supplementary Data 10

Description: Enrichment of cell-specific sites across GTEx brain regions.

File Name: Supplementary Data 11

Description: Max-edQTLs across bulk GTEx brain regions.
